# Supplementary material for: Carbohydrate–protein recognition probed by density functional theory and ab initio calculations including dispersive interactions
Source: Royal Society of Chemistry journal article supplement (doi:10.1039/b809164a), 2008-01-01
Supplement: b809164a.pdf [file b809164a.pdf]

**Carbohydrate-Protein recognition probed by density functional theory and *ab initio* calculations including dispersive interactions.**

Rajesh K. Raju, Anitha Ramraj, Mark A. Vincent, Ian H. Hillier and Neil A. Burton

*School of Chemistry, University of Manchester, Oxford Road, Manchester, M13 9PL, UK.*

Table S1. Relative energies ( $\text{kcal mol}^{-1}$ ) and O-H vibrational frequencies ( $\text{cm}^{-1}$ ) for fucose monomers (DFT-D/TZV2D).

| Monomer | Relative Energy <sup>a</sup> | O-H Stretch |      |      |      |
|---------|------------------------------|-------------|------|------|------|
|         |                              | OH1         | OH2  | OH3  | OH4  |
| A       | 0.16                         | 3673        | 3678 | 3656 | 3631 |
| B       | 0.00                         | 3628        | 3661 | 3662 | 3632 |
| C       | 1.63                         | 3643        | 3656 | 3634 | 3631 |

<sup>a</sup> with zero point and thermodynamic corrections, at 298 K.

Table S2. C-H frequencies ( $\text{cm}^{-1}$ ) for fucose monomers (DFT-D/TZV2D).

| Monomer | C-H Stretch |      |      |      |      |        |        |        |
|---------|-------------|------|------|------|------|--------|--------|--------|
|         | CH1         | CH2  | CH3  | CH4  | CH5  | CH6(a) | CH6(b) | CH6(c) |
| A       | 2853        | 2973 | 2924 | 2904 | 2879 | 2980   | 3040   | 3062   |
| B       | 2920        | 2946 | 2926 | 2909 | 2890 | 2980   | 3042   | 3062   |
| C       | 2874        | 3002 | 2890 | 2912 | 2877 | 2980   | 3042   | 3062   |

Table S3. Structures of  $\alpha$ -methyl glucose-toluene complexes at the MP2/6-31G\*\* level. U, L and S label Upper, Lower and Side-on structures, Lower being on the same side as the OMe group of the sugar. M, C and CC label the arrangement of the C(2), C(3) and C(4) hydroxyl groups of the sugar, M for mixed (meaning no pattern), C for all clockwise and CC for all counter clockwise. T, GP and GM label the orientation of the exogenous side chain oxygen atom. For T structures the O-C(5)-C(6)-O dihedral angle is approximately trans, whilst for GP and GM structures the dihedral angle is gauche (P for counter clockwise and M for clockwise). The final value is the O-C(6)...C(T)-CH<sub>3</sub> dihedral angle (unsigned) where C(T) is the tertiary carbon of toluene and CH<sub>3</sub> is the methyl group of toluene, and gives the relative orientation of the sugar and toluene. Finally the relative energies of each complex to the lowest are given in kcal mol<sup>-1</sup>.

|             |      |             |      |
|-------------|------|-------------|------|
| U-M-T-116   | 4.91 | L-M-T-59    | 4.38 |
| U-M-T-71    | 4.54 | L-M-T-55    | 3.08 |
| S-CC-GP-127 | 1.88 | L-M-GP-40   | 5.41 |
| U-M-GP-42   | 3.50 | L-M-T-7     | 1.48 |
| S-M-GP-44   | 4.74 | L-M-GM-33   | 2.93 |
| U-M-T-37    | 3.15 | L-CC-GM-3   | 0.31 |
| U-M-GP-121  | 3.06 | L-CC-GM-41  | 1.36 |
| U-M-GP-166  | 2.50 | L-CC-T-6    | 0.00 |
| U-M-GP-42   | 1.82 | L-CC-GP-104 | 1.82 |
| U-CC-T-148  | 2.44 | L-CC-GP-105 | 2.18 |
| U-CC-T-31   | 1.98 | L-CC-GP-133 | 1.81 |
| U-CC-GM-145 | 2.49 | L-CC-GP-171 | 2.12 |
| U-CC-GP-156 | 1.30 | L-CC-GP-27  | 1.29 |
| U-CC-GP-48  | 1.29 | L-CC-GP-2   | 0.39 |
| U-CC-GP-93  | 2.02 | L-CC-GP-42  | 3.13 |
| S-CC-GP-83  | 4.78 | L-M-T-97    | 4.98 |
| U-CC-GP-45  | 3.63 | L-M-T-149   | 2.07 |
| U-M-GP-160  | 3.55 | L-C-T-117   | 5.52 |
| U-C-T-151   | 6.60 | S-CC-GP-58  | 4.39 |
| U-CC-GM-26  | 2.12 |             |      |

Table S4. The relative energies (kcal mol<sup>-1</sup>) of the three main sugar conformations of  $\alpha$ -methyl glucose at the MP2/6-31G\*\* and, in parentheses, at the DFT-D/TZV2D level.

| Sugar conformation |             |             |
|--------------------|-------------|-------------|
|                    | Energy      | Free energy |
| A (T)              | 0.09 (0.24) | 0.29 (0.45) |
| B (G-)             | 0.01 (0.00) | 0.32 (0.00) |
| C (G+)             | 0.00 (0.13) | 0.00 (0.08) |

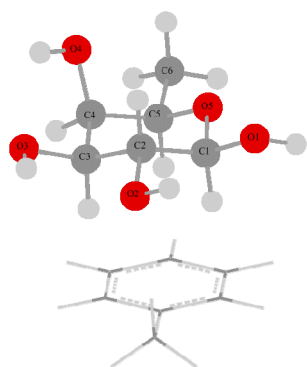

1

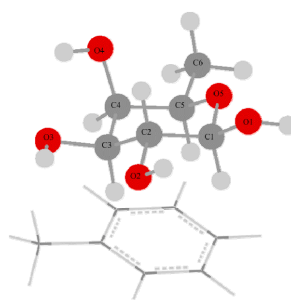

2

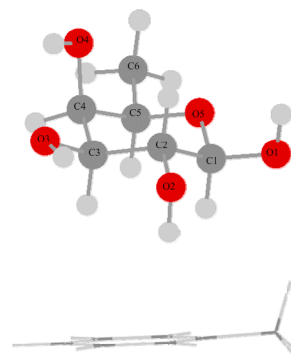

3

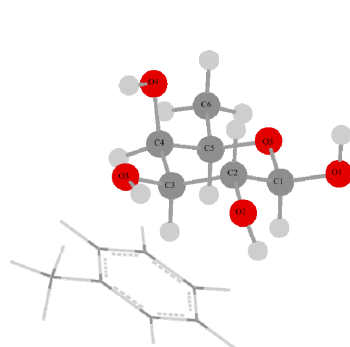

4

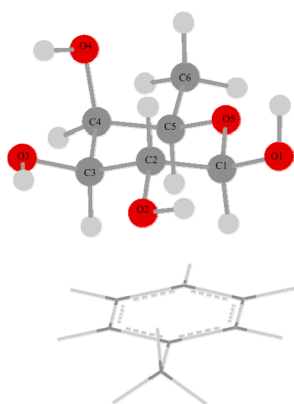

5

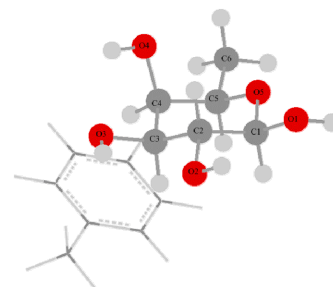

6

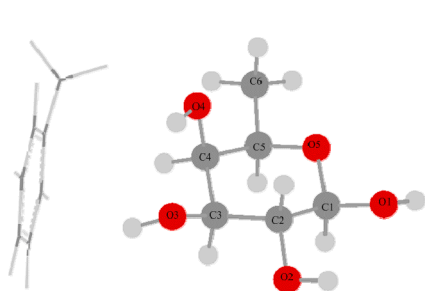

7

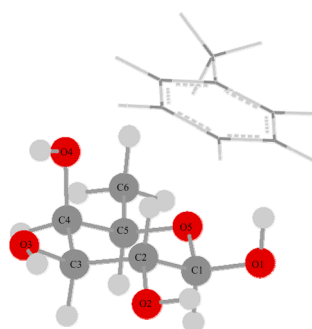

8

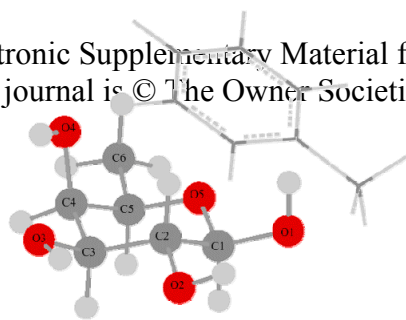

9

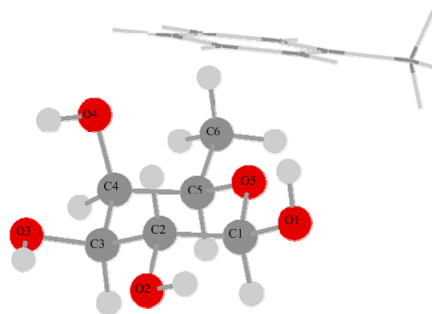

10

Fig. S1 Optimized structures of fucose-toluene complexes at DFT-D/TZV2D level.

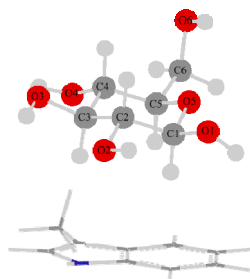

1

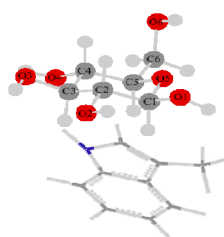

2

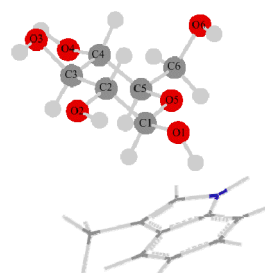

3

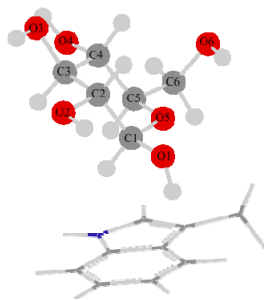

4

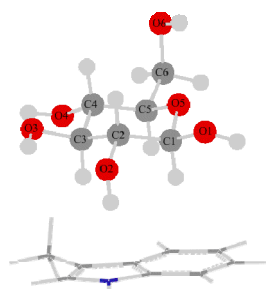

5

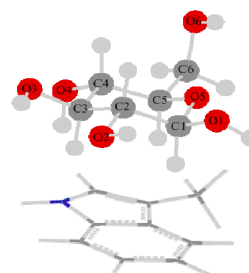

6

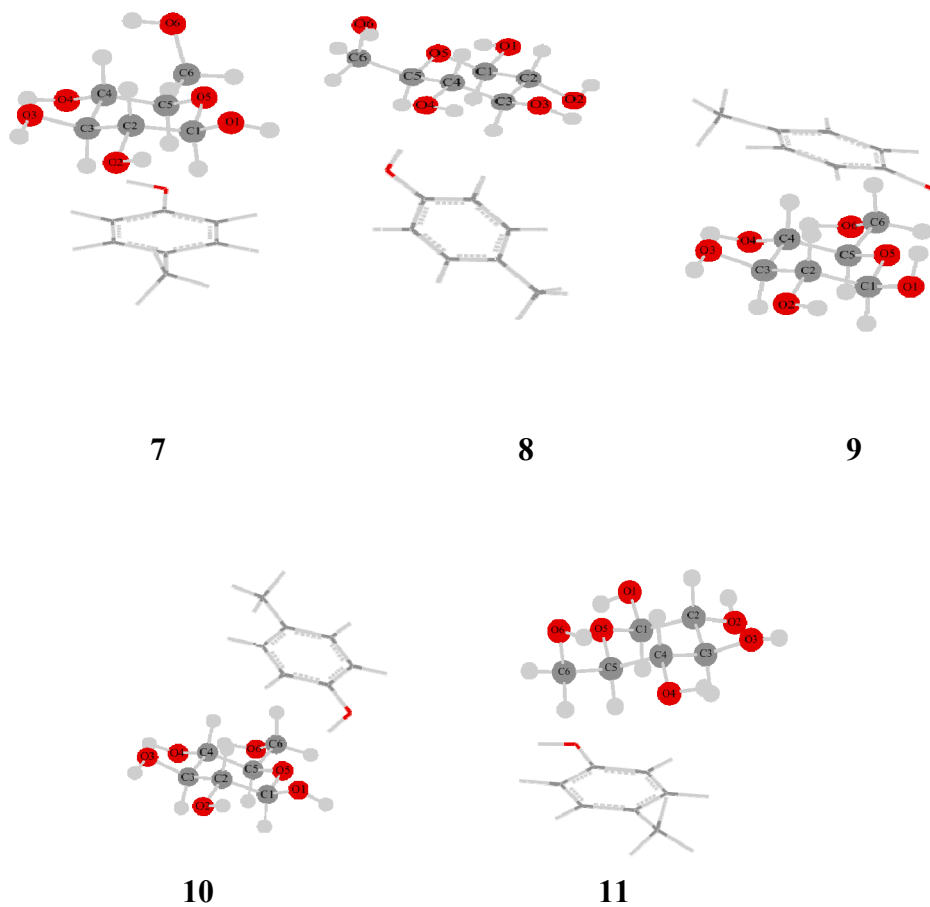

Fig. S2. Optimized structures of glucose–3-methylindole and –*p*-hydroxytoluene complexes

**The procedure for extrapolating the MP2 energy to the complete basis set (CBS) limit .**

The extrapolation to the basis set limit requires calculations at both MP2 and Hartree Fock (HF) levels using two basis sets of different sizes, here taken to be aug-cc-pVDZ and aug-cc-pVTZ .

The corresponding energies are substituted into the following equations of Helgaker and co-workers <sup>1</sup>.

$$E^{\text{HF}}(X) = E^{\text{HF}}(\text{CBS}) + Ae^{-\alpha X}$$

$$E^{\text{corr}}(X) = E^{\text{corr}}(\text{CBS}) + BX^{-3}$$

Here  $E^{\text{HF}}$  and  $E^{\text{corr}}$  are the Hartree Fock and correlation (MP2) energies,  $X=2$  for a double-zeta basis set (aug-cc-pVDZ) and  $X=3$  for a triple-zeta basis set (aug-cc-pVTZ), and  $\alpha$  equals 1.43. These equations are then solved to give  $E^{\text{corr}}(\text{CBS})$  and  $E^{\text{HF}}(\text{CBS})$ , which are then combined to give the required CBS total energy.

The individual energies for the two complexes (au) are:

| Complex                                                | HF          | MP2         |
|--------------------------------------------------------|-------------|-------------|
| <u><i>Benzene and <math>\beta</math>-Galactose</i></u> |             |             |
| aug-cc-pVDZ                                            | -914.182064 | -917.081990 |
| aug-cc-pVTZ                                            | -914.386055 | -917.867677 |
| <u><i>Benzene</i></u>                                  |             |             |
| aug-cc-pVDZ                                            | -230.729362 | -231.545350 |
| aug-cc-pVTZ                                            | -230.779954 | -231.746515 |
| <u><i><math>\beta</math>-Galactose</i></u>             |             |             |
| aug-cc-pVDZ                                            | -683.455682 | -685.526994 |
| aug-cc-pVTZ                                            | -683.609096 | -686.110627 |

*Fucose and Toluene*

|             |             |             |
|-------------|-------------|-------------|
| aug-cc-pVDZ | -878.355166 | -881.216459 |
|-------------|-------------|-------------|

|             |             |             |
|-------------|-------------|-------------|
| aug-cc-pVTZ | -878.551763 | -881.978908 |
|-------------|-------------|-------------|

*Fucose*

|             |             |             |
|-------------|-------------|-------------|
| aug-cc-pVDZ | -608.586920 | -610.463857 |
|-------------|-------------|-------------|

|             |             |             |
|-------------|-------------|-------------|
| aug-cc-pVTZ | -608.723880 | -610.987078 |
|-------------|-------------|-------------|

*Toluene*

|             |             |             |
|-------------|-------------|-------------|
| aug-cc-pVDZ | -269.769561 | -270.738300 |
|-------------|-------------|-------------|

|             |             |             |
|-------------|-------------|-------------|
| aug-cc-pVTZ | -269.829187 | -270.976177 |
|-------------|-------------|-------------|

1 A. Halkier, T. Helgaker, P. Jorgensen, W. Klopper, H. Koch, J. Olsen and A. K. Wilson, Chem. Phys. Letters, 1998, **286**, 243.
